# Supplementary material for: Design and Planning of a Transdisciplinary Investigation into Farmland Pollinators: Rationale, Co-Design, and Lessons Learned
Source: MDPI journal article supplement (doi:10.3390/su141710549), 2022-08-24
Supplement: s1 [file s1]

Archive with 2 entries (2 files):
- Hodge et al. Supplementary Documents S1-S9.pdf
- Hodge et al. Supplementary Domument S10.pdf
